# Supplementary material for: Preeclampsia and the Risk of End-Stage Renal Disease
Source: Atypon-hosted journal article supplement (doi:10.1056/nejmoa0706790), 2008-08-20
Supplement: nejm_vikse_800sa1.pdf [file nejm_vikse_800sa1.pdf]

## Supplementary Appendix

This appendix has been provided by the authors to give readers additional information about their work.

Supplement to: Vikse BE, Irgens LM, Leivestad T, Skjærven R, Iversen BM. Preeclampsia and the risk of end-stage renal disease. *N Engl J Med* 2008;359:800-9.

Table for web appendix. Preeclampsia, preterm birth and risk of ESRD, analysed separately after first, second and third pregnancy. Norway, births 1967-2004, ESRD 1980-2005.

|                                                      | N Total <sup>a</sup> | N ESRD <sup>a</sup> | Rate per<br>100,000<br>years <sup>b</sup> | Relative risk<br>(95% CI)<br>Unadjusted | Relative risk<br>(95% CI)<br>Model 1 <sup>c</sup> | Relative risk<br>(95% CI)<br>Model 2 <sup>d</sup> |
|------------------------------------------------------|----------------------|---------------------|-------------------------------------------|-----------------------------------------|---------------------------------------------------|---------------------------------------------------|
| <b>After one pregnancy</b>                           |                      |                     |                                           |                                         |                                                   |                                                   |
| <b>– all women</b>                                   |                      |                     |                                           |                                         |                                                   |                                                   |
| No preeclampsia, no preterm offspring                | 490,611              | 312                 | 2.8 (2.5-3.1)                             | 1.0                                     | 1.0                                               | 1.0                                               |
| No preeclampsia, preterm offspring                   | 29,033               | 71                  | 11 (8-13)                                 | 3.8 (2.9-4.9)                           | 3.5 (2.7-4.6)                                     | 2.0 (1.4-3.0)                                     |
| Preeclampsia, no preterm offspring                   | 16,611               | 36                  | 9.7 (6.8-13)                              | 3.7 (2.6-5.2)                           | 3.6 (2.5-5.0)                                     | 2.8 (1.8-4.4)                                     |
| Preeclampsia, preterm offspring                      | 2,924                | 23                  | 37 (23-54)                                | 15 (10-23)                              | 12 (8-19)                                         | 6.2 (3.0-12)                                      |
| <b>After two pregnancies</b>                         |                      |                     |                                           |                                         |                                                   |                                                   |
| <b>– women with two or more pregnancies</b>          |                      |                     |                                           |                                         |                                                   |                                                   |
| No preeclampsia, no preterm offspring                | 371,492              | 187                 | 2.4 (2.1-2.8)                             | 1.0                                     | 1.0                                               | 1.0                                               |
| No preeclampsia, ≥ 1 preterm offspring               | 37,692               | 50                  | 6.4 (4.7-8.3)                             | 2.6 (1.9-3.6)                           | 2.3 (1.6-3.2)                                     | 1.6 (1.1-2.5)                                     |
| 1 pregnancy with preeclampsia, no preterm offspring  | 14,981               | 31                  | 10 (7-14)                                 | 4.5 (3.1-6.6)                           | 4.2 (2.9-6.2)                                     | 3.2 (1.9-5.2)                                     |
| 1 pregnancy with preeclampsia, ≥ 1 preterm offspring | 3,373                | 11                  | 17 (9-29)                                 | 8.0 (4.4-15)                            | 5.8 (3.0-11)                                      | 3.7 (1.4-10)                                      |
| 2 pregnancies with preeclampsia                      | 2,411                | 7                   | 15 (6-29)                                 | 7.5 (3.5-16)                            | 5.6 (2.5-13)                                      | 2.9 (0.7-12)                                      |
| <b>After three pregnancies</b>                       |                      |                     |                                           |                                         |                                                   |                                                   |
| <b>– women with three or more pregnancies</b>        |                      |                     |                                           |                                         |                                                   |                                                   |
| No preeclampsia, no preterm offspring                | 142,663              | 54                  | 2.1 (1.6-2.7)                             | 1.0                                     | 1.0                                               | 1.0                                               |
| No preeclampsia, 1 preterm offspring                 | 18,144               | 12                  | 3.6 (1.8-5.9)                             | 1.6 (0.9-3.0)                           | 1.5 (0.8-2.8)                                     | 0.9 (0.4-2.4)                                     |
| No preeclampsia, ≥ 2 preterm offspring               | 2,968                | 6                   | 11 (4-21)                                 | 4.4 (1.9-10)                            | 3.8 (1.6-9.4)                                     | 2.3 (0.5-9.5)                                     |
| 1 pregnancy with preeclampsia, 0 preterm offspring   | 6,814                | 11                  | 9.4 (4.7-21)                              | 4.7 (2.5-9.0)                           | 4.2 (2.1-8.2)                                     | 4.0 (1.8-8.9)                                     |
| 1 pregnancy with preeclampsia, ≥ 1 preterm offspring | 1,921                | 12                  | 38 (20-63)                                | 19 (10-35)                              | 16 (8-32)                                         | 18 (8-40)                                         |
| ≥2 pregnancies with preeclampsia                     | 1,400                | 7                   | 31 (12-59)                                | 17 (8-37)                               | 11 (4-28)                                         | 3.8 (0.5-28)                                      |

<sup>a</sup>Women with missing information on gestational age were excluded from these analyses

<sup>b</sup>Number of ESRD per 100,000 years of observation after last included pregnancy.

<sup>c</sup>Adjusted for year, age, marital status, stillbirth and congenital malformations of offspring in all included pregnancies.

<sup>d</sup> Women diagnosed with essential hypertension, kidney disease, rheumatic disease or diabetes mellitus before first, second or third pregnancy were excluded; analyses adjusted for year, age, marital status, stillbirth and congenital malformations of offspring in all included pregnancies
